1 **Transposon-induced inversions activate gene expression in Maize pericarp**

2 Sharu Paul Sharma<sup>\*</sup>, Tao Zuo<sup>\*</sup> and Thomas Peterson<sup>\*†</sup>

3 <sup>\*</sup> Department of Genetics, Development and Cell Biology, Iowa State University, Ames, IA  
4 50011

5 <sup>†</sup> Department of Agronomy, Iowa State University, Ames, IA 50011

6

7 **Abstract**

8 Chromosomal inversions can have considerable biological and agronomic impacts including  
9 disrupted gene function, change in gene expression and inhibited recombination. Here we  
10 describe the molecular structure and functional impact of six inversions caused by Alternative  
11 Transpositions between *p1* and *p2* genes responsible for floral pigmentation in maize. In maize  
12 line *p1-wwB54*, the *p2* gene is expressed in anther and silk but not in pericarp, making the  
13 kernels white. We identified inversions in this region caused by transposition of *Ac* and *fractured*  
14 *Ac (fAc)* transposable elements. These inversions change the position of a *p1* enhancer and  
15 activate the expression of *p2* in the kernel pericarp, resulting in red kernel color. We hypothesize  
16 that these inversions place the *p2* gene promoter near a *p1* gene enhancer, thereby activating *p2*  
17 expression in kernel pericarp.

18

19

20

21

22

23

## 24 **Introduction**

25 Transposable elements are segments of DNA that can move within a genome. The maize  
26 *Activator (Ac)* and *Dissociation (Ds)* transposable elements are members of the *hAT* transposon  
27 super-family, which is widespread in eukaryotes (Rubin *et al.* 2001). Barbara McClintock  
28 discovered these transposons while studying the phenomenon of chromosome breakage. She  
29 identified *Ds* as a locus on the short arm of chromosome 9 in some maize stocks where  
30 chromosome breaks occurred frequently. She also showed that *Ds* is dependent on another  
31 element *Ac* which is autonomous and can itself transpose. The *Ac/Ds* system was also reported to  
32 induce a variety of chromosomal rearrangements, such as translocations, deletions, duplications,  
33 and inversions (McClintock 1950, 1951). The autonomous *Ac* element is 4565 bp in length and  
34 carries a complete transposase gene. *Ds* elements vary in size and internal sequence and lack a  
35 functional transposase gene, making them non-autonomous (Lazarow *et al.* 2013). The *Ac*  
36 transposase is known to bind to subterminal motif sequences of *Ac/Ds* elements and then cut at  
37 the transposon 5' and 3' TIRs (Terminal Inverted Repeats; 11 bp imperfect repeats) (Becker and  
38 Kunze 1997). *Ac* transposase can recognize and act on the termini of a single element (Standard  
39 Transposition), or the termini of two different elements (Alternative Transposition); for example,  
40 the 5' end of *Ac* and the 3' end of a second nearby element such as *Ds* or *fractured Ac (fAc)* (Su  
41 *et al.* 2018). Standard Transposition events change only the position of a single element, while  
42 Alternative Transposition events can produce a variety of genome rearrangements, depending on  
43 the relative orientations of the TE termini and the location of the target site. When two  
44 transposons are in direct orientation, the internal-facing termini are present in a reversed  
45 orientation compared to the termini of a single transposon. In this configuration, the two facing  
46 termini can undergo Reversed-Ends Transposition (RET) (Huang and Dooner 2008; Zhang and

47 Peterson 2004; Zhang *et al.* 2009) to induce deletions (Zhang, J. and Peterson 2005; Zhang, J. *et*  
48 *al.* 2006), duplications (Zhang *et al.* 2013), Composite Insertions (Zhang *et al.* 2014; Su *et al.*  
49 2018, 2020), inversions (Zhang and Peterson 2004; Yu *et al.* 2011) and reciprocal translocations  
50 (Pulletikurti *et al.* 2009; Zhang *et al.* 2009). For example, Zhang *et al.* 2009 described 17  
51 reciprocal translocations and two large pericentric inversions derived by RET from a progenitor  
52 allele containing *Ac* and *fAc* insertions in the maize *p1* gene. The frequent occurrence of these  
53 structural changes and the fact that *Ac* inserts preferentially in or near genic regions (Kolkman *et*  
54 *al.* 2005) suggest that Alternative Transposition events may have a significant impact on the  
55 genome and transcriptome. Additionally, inversions provide an opportunity to analyze the  
56 function of *cis*-regulatory elements, such as enhancers, in a native (non-transgenic) context.

57

58 The maize *p1* and *p2* genes are closely linked paralogous genes located on the short arm of  
59 chromosome 1 that originated by duplication of an ancestral *Ppre* gene, approximately 2.75 mya  
60 (Zhang, P. *et al.* 2000). These genes are separated by a ~70 kb intergenic region and coincide  
61 with a major QTL for levels of silk maysin, a flavone glycoside with antibiotic activity toward  
62 corn earworm (Zhang *et al.* 2003; Meyer *et al.* 2007). Both *p1* and *p2* encode highly similar  
63 R2R3 Myb transcription factors involved in controlling the structural genes *c2*, *chi*, and *al*,  
64 encoding chalcone synthase, chalcone isomerase, and dihydro-flavonol reductase, respectively  
65 (Dooner *et al.* 1991; Grotewold *et al.* 1994). These enzymes of the flavonoid biosynthetic  
66 pathway produce red phlobaphene pigments in maize floral organs. *p1* is expressed in maize  
67 kernel pericarp, cob, and silk, while *p2* is active in anther and silk (Zhang, P. *et al.* 2000; Goettel  
68 and Messing 2009). Different *p1* alleles are indicated by a two-letter suffix indicating their

69 expression in kernel pericarp and cob glumes; for example, *p1-ww* specifies white (colorless)  
70 pericarp and white cob, while *P1-wr* indicates white pericarp and red cob.

71

72 The robust visual phenotypes and abundance of alleles with *Ac* insertions (Athma *et al.* 1992;  
73 Moreno *et al.* 1992) make the *p1/p2* cluster an ideal genetic system to analyze the genetic impact  
74 of Alternative Transposition events. The *p1-wwB54* allele has a deletion of *p1* exons 1 and 2  
75 along with insertions of *Ac* and fractured *Ac* (*fAc*) elements upstream of *p1* exon 3 (Yu *et al.*  
76 2011). Because exons 1 and 2 encode most of the essential Myb DNA binding domain  
77 (Grotewold *et al.* 1991) their deletion renders the *p1* gene non-functional leading to white kernel  
78 pericarp and white cob. The 5' *Ac* and 3' *fAc* termini are in a reversed orientation, separated by a  
79 331 bp inter-transposon segment. These elements exhibit frequent RET, leading to chromosome  
80 breakage and rearrangements such as deletions and inversions (Yu *et al.*, 2011). Here, we used  
81 the *p1-wwB54* allele as a starting point to isolate a variety of *p1/p2* gain of function alleles.  
82 Among these, we identified independent cases of inversions with varying degrees of red kernel  
83 pigmentation, possibly due to the activation of *p2* in pericarp tissue. Here we describe the  
84 detailed structures and *p2* expression characteristics of six inversion cases.

85

## 86 **Materials and Methods**

### 87 ***Screening for Inversions derived from RET***

88 The inversion alleles described here were derived from *p1-wwB54* (Figure 1). Stock J (*p1-*  
89 *ww[4Co63] r1-m3::Ds*) (described in Zhang *et al.* 2003) was used as common genetic  
90 background and to detect the presence of *Ac* by excision of *Ds* from *r1-m3*. The occurrence of  
91 red kernel pericarp in *p1-wwB54* was used as a visual screen for *p2* activation in the pericarp (see

92 Materials and Methods in Su *et al.* 2020). *p1-wwB54* has white kernels, but approximately 1 in 8  
93 ears were found to have a single red kernel, and ~1 in 40 ears had a multi-kernel red sector  
94 (Figure 1, F86). The occurrence of a sector of red-colored pericarp on single or multiple kernels  
95 reflects the stage of ear and kernel development at which an activating mutation (e.g.  
96 transposition) occurred. Events that occurred sufficiently early (prior to embryo formation) can  
97 be inherited (Emerson 1917). The red kernels were selected and planted, and in cases where the  
98 new structure was transmitted through meiosis, the resulting plants would produce whole ears  
99 with red kernels (Figure 1, S25). The pericarp is maternal tissue and hence the red color  
100 phenotype is independent of the pollination parent.

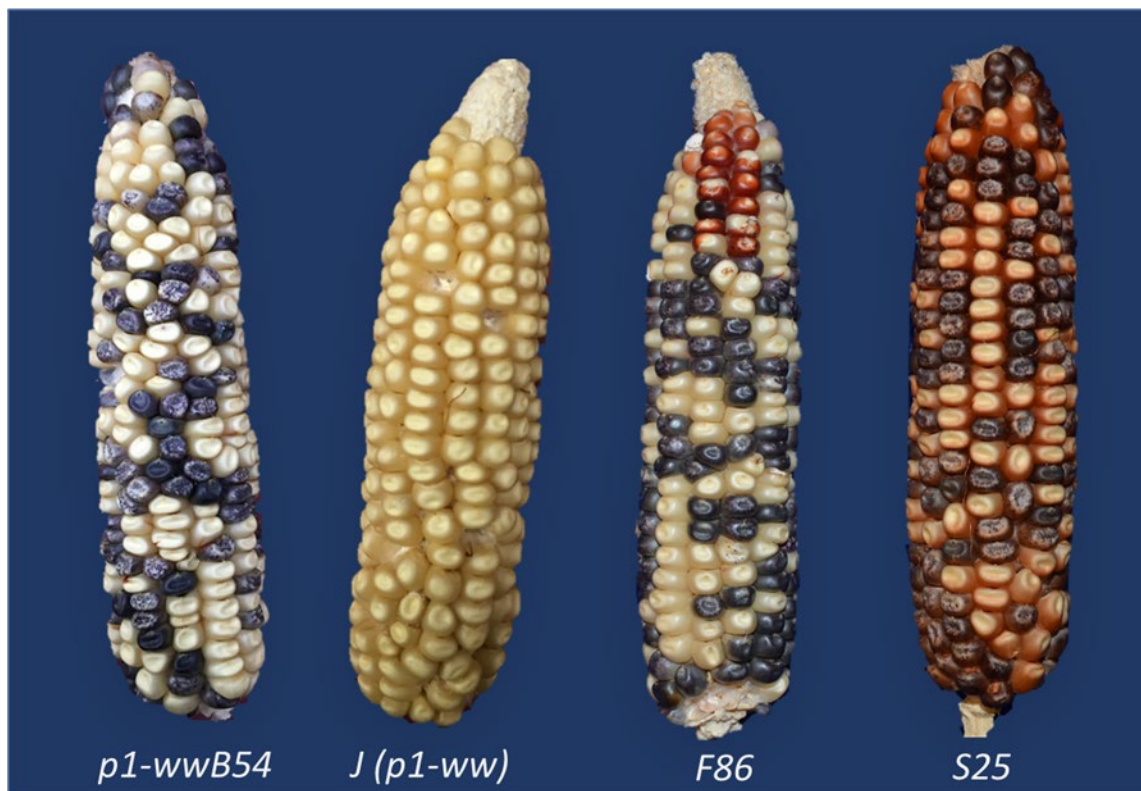

101  
102 Figure 1: Ears of Different Maize *p1/p2* Alleles. Alleles *p1-wwB54* and *J (p1-ww)* have white (colorless)  
103 kernel pericarp. F86 is a *p1-wwB54* ear in which a sector of kernels near the ear tip has red pericarp due  
104 to activation of *p2*. S25 is an inversion allele with red pericarp color on the whole ear. Kernels with  
105 purple-sectored aleurone are due to *Ac*-induced excision of *Ds* from *r1-m3::Ds*.

106

### 107 ***DNA extraction, Gel Electrophoresis, and Southern Blotting***

108 Genomic DNA was extracted from maize seedling leaves by a modified CTAB method (Saghai-  
109 Maroof *et al.* 1984) and digested with different restriction enzymes according to the  
110 manufacturer's instructions. For Southern blotting, genomic DNA digests were done with *KpnI*,  
111 *HpaI*, and *EcoRV*. Agarose gels (0.7%) were run under 30 to 50 volts for 18 to 24 hours for  
112 maximum separation of large fragments. The DNA was then transferred to a membrane for 24  
113 hours, followed by probing each membrane with Fragment-15 (*f15*), a 411 bp sequence two  
114 copies of which are located within the enhancer of the *pl* gene (Zhang F. and Peterson 2005).

115

### 116 ***PCR, iPCR, and Sequencing***

117 PCR was performed with 20  $\mu$ L reaction volumes under the following temperature conditions:  
118 95° for 2 min, then 35 cycles at 95° for 30 sec, 60° for 30 sec, and 72° for 1 min per 1-kb length  
119 of the expected PCR product, then final extension at 72° for 5 min. For initial PCR screening of  
120 new alleles, a high-efficiency agarose gel electrophoresis method was used to visualize PCR  
121 products (Sharma and Peterson 2020). Inversion breakpoint junctions ending with *fAc* elements  
122 were obtained by inverse-PCR (iPCR; Ochman *et al.* 1988). Inversion breakpoints at *Ac*  
123 elements were isolated by *Ac* casting (Singh *et al.* 2003; Wang and Peterson 2013). This method  
124 relies on the occurrence of frequent *Ac* transpositions to closely linked sites during plant  
125 development. For each inversion, genomic DNA was isolated from seedling leaf tissue and then  
126 the region containing the breakpoint was amplified by two pairs of nested PCR primers (Set 1  
127 and then Nested in Table S1). The inversion breakpoint regions from I-PCR and *Ac* casting were

128 sequenced by the Iowa State University DNA Sequencing Facility. Sequences were analyzed  
129 using Snapgene (snapgene.com) and BLAST (Zhang, Z. *et al.* 2000).

130

### 131 ***RT-PCR Detection of p2 Expression***

132 Pericarps were peeled from kernels 15 to 20 days after pollination (DAP) and flash-frozen in  
133 liquid nitrogen. Three biological replicates (pericarps from 3 sibling ears) were pooled to extract  
134 RNA. RNA was isolated using Purelink Plant RNA Reagent, treated with NEB DNaseI, and  
135 reverse transcribed to cDNA using Invitrogen™ SuperScript™ II Reverse Transcriptase kit using  
136 protocols recommended by the product suppliers. Two technical replicates of reverse  
137 transcription were used per sample. cDNAs were amplified by PCR using primers specific to  
138 exons 1 and 3 of the *p2* gene transcript (Table S3). Primers specific to the maize *Beta-tubulin*  
139 gene were used as an internal control.

140

### 141 ***Data availability***

142 Maize genetic stocks are available by request to T.P. Sequences reported here are available in the  
143 Supplemental Material.

144

## 145 **Results**

146 Due to the deletion of *p1* exons 1 and 2, the *p1-wwB54* was expected to be a stable null allele.  
147 We were surprised to see ears carrying *p1-wwB54* produced red kernel pericarp sectors of  
148 varying sizes (Figure 1). We hypothesized that the *p2* gene, which is normally not expressed in  
149 kernel pericarp, could be activated by inversions generated by Reversed Ends Transposition  
150 (RET) (Zhang and Peterson 2004; Zhang, J. and Peterson 2005; Zhang *et al.* 2009, 2013; Huang

151 and Dooner 2008; Yu *et al.* 2011; Su *et al.* 2020). A diagram of this model showing an inversion  
152 with breakpoints in the *p2* promoter region is shown in Figure 2. According to this model, RET  
153 would begin with excision of the *Ac* 5' end and *fAc* 3' end in *p1-wwB54*, followed by insertion of  
154 the excised termini into a new target site unique for each event (Figure 2, *a/b*). If the 5' end of *Ac*  
155 (solid red arrowhead, Figure 2) joined with the 'a' side of the target sequence, and 3' end of *fAc*  
156 (white arrowhead, Figure 2) joined with the 'b' side of the target site, the segment from 5' end of  
157 *Ac* up to the target site *a/b* will be inverted (for animation, see Supplemental data). The resulting  
158 structure (Figure 2, *Lower*) contains an inversion of the *p1-p2* interval; if the *p2* gene promoter  
159 region is inserted sufficiently near the *p1* 3' pericarp enhancer (Sidorenko *et al.*, 2000), *p2* may  
160 be expressed in the kernel pericarp.

161

162

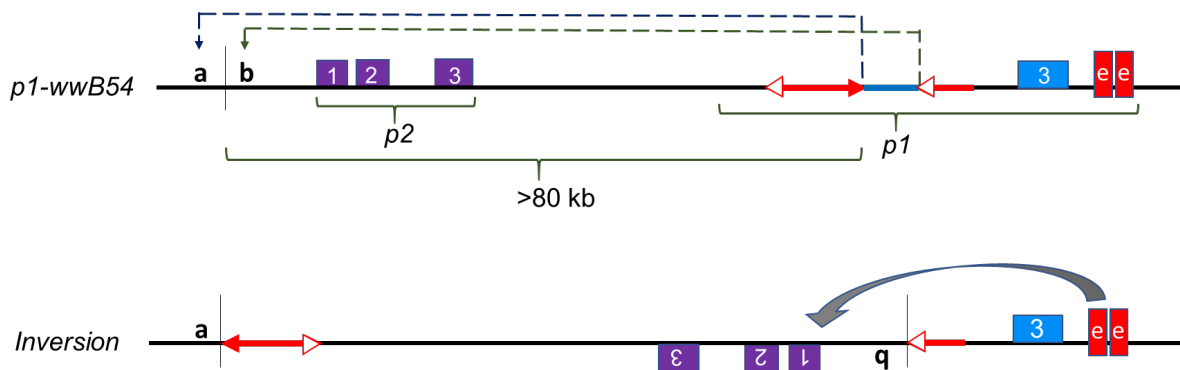

163

164 Figure 2: Model of RET-induced inversion leading to *p2* activation.

165 *Upper*: Diagram of progenitor allele *p1-wwB54* and nearby *p2* gene: Purple and blue boxes indicate  
166 exons of *p2* and *p1* genes, respectively. Red arrows represent *Ac* (with two arrowheads) and *fAc* (with  
167 single arrowhead) elements. Red boxes indicate two copies of *p1* enhancer fragment *f15*. Dashed lines  
168 indicate *Ac/fAc* excision by RET and re-insertion at *a/b* target site upstream of *p2*. The 331 bp DNA



169 fragment between *Ac* and *fAc* (blue line) is lost during the transposition event. The same symbols and  
170 coloring scheme are used in other figures in this paper.

171 *Lower: Inversion:* Inverted segment extends from point *a* (*Ac* junction) to point *b* (*fAc* junction) and  
172 includes *Ac*, *p1-p2* intergenic region, and *p2* gene. In the inversion allele, the proximity of the *p2* promoter  
173 to the *p1* 3' enhancer may activate *p2* expression in the pericarp.

174

### 175 ***Screening for Inversions***

176 To obtain RET-induced inversions, ears from several thousand plants carrying the *p1-wwB54*  
177 allele were screened for kernels with red pericarp (example in Figure 1, third ear from left).  
178 Selected red kernels were grown and propagated to obtain stable lines with various shades of red  
179 kernel pericarp. Genomic DNA preparations from these lines were tested for structural  
180 rearrangements by PCR using sets of primer pairs (Table S1) that can amplify the *Ac* and *fAc*  
181 junctions in *p1-wwB54*: primer set 1 detects the *p1/3' Ac* junction, and primer set 2 detects the  
182 5' *Ac/p1/3' fAc* segment (Figure 3A). Simple *Ac* transposition or RET-induced deletion (Yu *et*  
183 *al.*, 2011) would result in negative PCR for both sets 1 and 2; while the formation of Composite  
184 Insertions (Su *et al.*, 2020) results in retention of both junctions. Whereas, RET-induced  
185 inversion would result in retention of the *p1/3' Ac* junction (Set 1 positive), and loss of the 5'  
186 *Ac/p1/3' fAc* segment (Set 2 negative). Using this test, several cases of putative inversions were  
187 detected (Figure 3B). These cases were further tested using primers flanking the downstream  
188 *fAc/p1* junction (Table S1) to confirm the retention of *fAc* at its original position next to *p1* exon  
189 3. Following confirmation of potential inversions, the new *Ac* and *fAc* inversion breakpoint  
190 junction sequences (*a/Ac* and *fAc/b* in Figure 3A) were amplified from genomic DNA using  
191 direct PCR, *Ac* Casting, or iPCR (see Methods) along with nested PCR. Once obtained, both  
192 inversion breakpoint junctions were sequenced (list of primers in Table S2). Junction sequences

193 were examined to confirm expected orientations based on the established *p1* and *p2* genomic  
194 sequence data (Zhang *et al.* 2006) and the presence of 8 bp TSDs (Target Site Duplication)  
195 characteristic of *Ac* transposition (Figure 3A, yellow box and Table S4).  
196

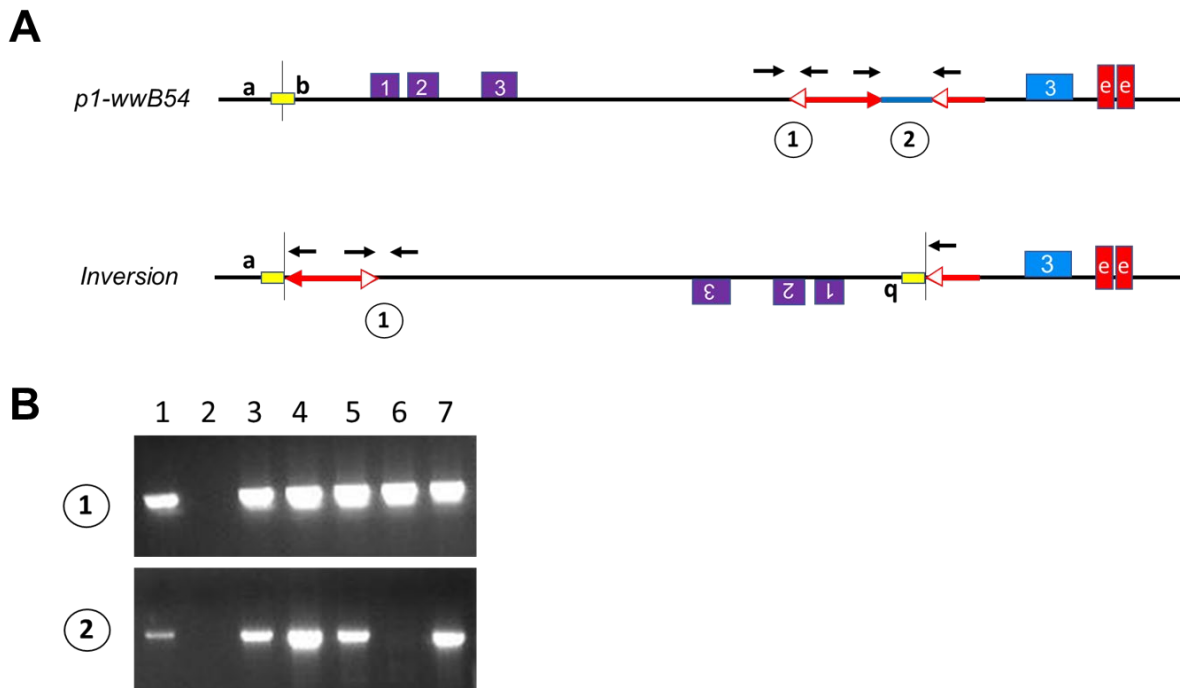

197

198 Figure 3: PCR Test for Inversions.

199 A) Progenitor *p1-wwB54* and derived *Inversion* allele structures showing locations of primers (black  
200 arrows) used in PCR tests. Primer Set 1 detects the *p1-Ac* junction which is present in both *p1-wwB54*  
201 and *Inversion*; Primer Set 2 detects the *Ac/p1/fAc* segment which is present in *p1-wwB54* and absent in  
202 *Inversion*. Yellow box is the 8 bp target site duplicated in inversion.  
203 B) Agarose Gel image showing an example PCR using Primer Set 1 (upper) and Primer Set 2 (lower).  
204 Lane 1, positive control (*p1-wwB54*); Lane 2, negative control (*p1-ww* Stock J); Lanes 3 – 7, candidates  
205 tested. Only lane 6 (allele 132, *not one of the cases described here*) is positive for Set 1, negative for Set  
206 2, as expected for inversions.

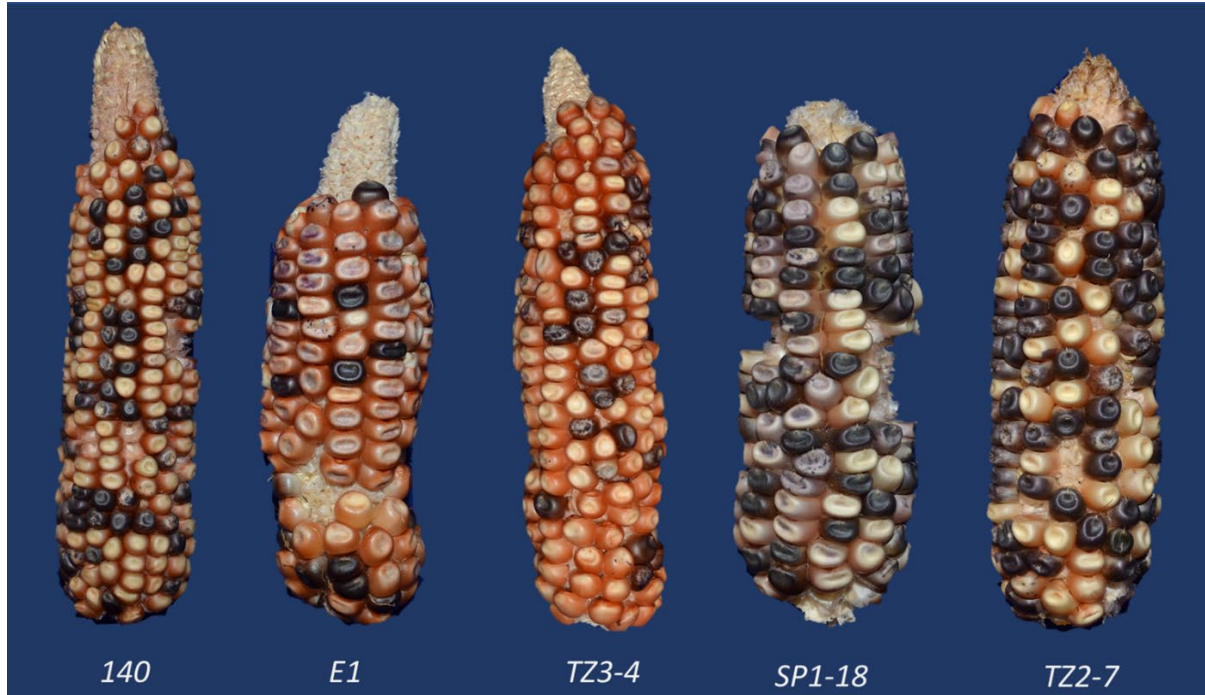

208 Figure 4: Representative Ears of Five Inversion Alleles. Ears have varying shades of red kernel pericarp  
209 due to *p2* activation. The sixth inversion case S25 is shown in Figure 1. Some kernels have purple or  
210 purple-sectored aleurone due to *Ac*-induced excision of *Ds* from *r1-m3* leading to anthocyanin  
211 pigmentation.

212

### 213 ***Structure of Inversions***

214 The structures of six independent inversions with red kernel pericarp were determined. Ears  
215 produced by plants carrying these inversions are shown in Figures 1 and 4. The inversion  
216 junctions were PCR-amplified and sequenced as described above, and their sequences compared  
217 with established *p1* and *p2* genomic sequences to identify the breakpoint locations. One  
218 breakpoint common to all cases is at the 5' end of *Ac* (Figure 5, vertical blue line), as expected  
219 for inversions originating by RET of *Ac* and *fAc* elements. The second breakpoint unique to each  
220 allele is at the transposition target site, located in a ~1 kb window from 2.6 to 3.5 kb upstream of  
221 the *p2* transcription start site in these six cases (Figure 5, vertical red lines). These inversions

222 reduce the distance between the *p2* transcription start site and the *p1* enhancer from 83.3 kb in  
223 the parental *p1-wwB54* allele to less than 10 kb in the inversion alleles (Figure 5 and Table S4).  
224 The inverted fragment size ranges from 80.9 to 81.8 kb. Each inversion allele contains an 8 bp  
225 repeat sequence at the inversion junctions, precisely at the ends of the *Ac* and *fAc* termini (Table  
226 S4). These 8 bp repeats represent the signature Target Site Duplications (TSDs) resulting from  
227 the staggered DNA cut made by *Ac* transposase. The presence of matching breakpoint TSDs  
228 confirms that each inversion originated from a single Alternative Transposition event involving  
229 the *Ac/fAc* elements.

230

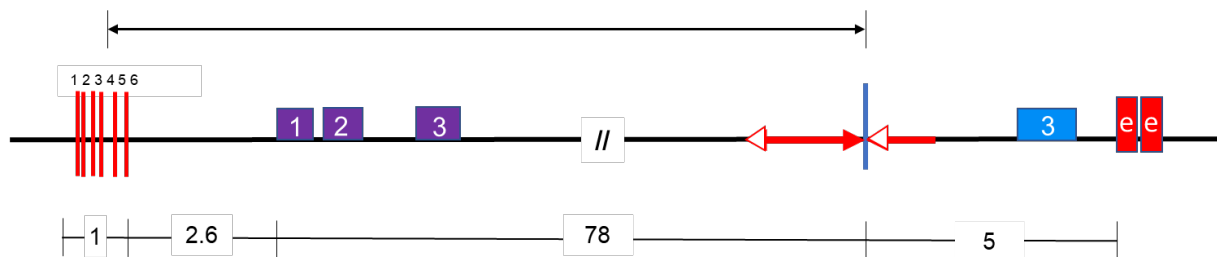

232 Figure 5: Map of the six inversion alleles. The vertical blue line is one breakpoint, and the red lines  
233 indicate the second breakpoint unique to each inversion. Numbers on red lines correspond to alleles, 1,  
234 140; 2, E1; 3, TZ3-4; 4, SP1-18; 5, S25; 6, TZ2-7. Numbers below the figure are distances in kbs.

235

236 After identifying the endpoints of the inversions, Southern blotting experiments were conducted  
237 to examine the internal structures of the inverted fragments. Endonuclease *KpnI* has recognition  
238 sites located such that the unique inversion breakpoint and the *p1* enhancer are contained in the  
239 same restriction fragment in all six cases of inversions (Figure 6). This inversion junction  
240 fragment was detected by hybridization with fragment-15 (*f15*) from within the *p1* enhancer. As  
241 shown in Figure 6A, *P1-rr4B2* (lane 3) gives two bands of size 6.3 kb and 8.6 kb as expected  
242 because it has two copies of the enhancer, one on each side (5' and 3') of the *p1* gene (Figure

243 6B; Sidorenko *et al.*, 2000). Whereas the inversion progenitor *p1-wwB54* (lane 4) gives a single  
 244 band of 13.5 kb representing the 3' enhancer fragment; the 5' enhancer fragment is deleted in  
 245 this allele (Figure 6C). The six inversion alleles (lanes 5 – 10) have progressively decreasing  
 246 band sizes, ranging from 12 to 10.5 kb, reflecting the size differences resulting from different  
 247 junction breakpoints 'b' in each inversion (Figure 6D). Similar results were obtained using other  
 248 restriction enzymes including *HpaI* and *EcoRV* (Figure S1) and probes (*Ac-H* for the *Ac*  
 249 element, and *p1* Fragment *8b* for *p2* intron 2; not shown). All the results are consistent with the  
 250 presence of a simple inversion in each of these six cases, with no evidence of additional  
 251 rearrangements.  
 252

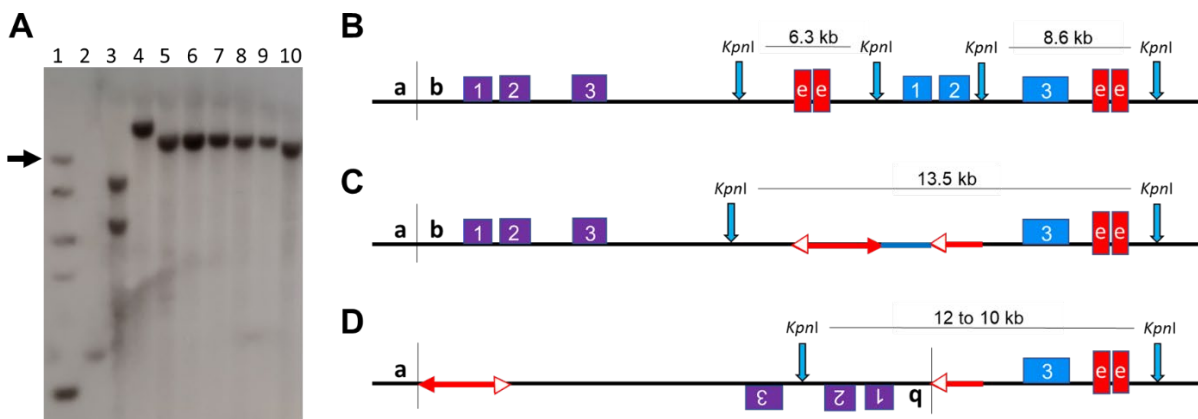

253  
 254 Figure 6: Genomic Southern Blot Analysis of Inversion Alleles.  
 255 A) Southern blot of genomic DNA samples from inversion homozygotes digested with *KpnI* and probed  
 256 with fragment *f15* from the *p1* enhancer (red boxes in B, C and D). Lane 1, DNA ladder (arrow points to  
 257 10 kb band); Lane 2, J (*p1-ww*); Lane 3, *P1-rr4B2*; Lane 4, progenitor *p1-wwB54* (top band is 13.5 kb);  
 258 Lane 5, 140; Lane 6, E1; Lane 7, TZ3-4; Lane 8, SP1-18; Lane 9, S25; Lane 10, TZ2-7. The six  
 259 inversions (Lanes 5 – 10) are arranged in order of decreasing band sizes (from 12 to 10.5 kb).  
 260 B, C and D) Diagrams showing *KpnI* restriction sites (vertical blue arrows) in B) *P1-rr4B2*, C) progenitor  
 261 *p1-wwB54* and D) inversions. Southern blot band sizes reflect differences in the sites of *fAc* insertion in  
 262 the *p2* promoter (breakpoint *b*).

263

## 264 *p2 Expression in Inversions*

265 The expression of the *p2* gene in plants homozygous for the inversion alleles was analyzed by  
266 RT-PCR. RNA was extracted from pericarps of homozygous plants collected 15-20 DAP (days  
267 after pollination) (Figure 7). *P1-rr4B2* was used as a positive control (Figure 7, lane 2) because  
268 *p1* is expressed in *P1-rr4B2* pericarp and the same *p2* primers can amplify *p1* transcripts due to  
269 sequence similarity. The six inversion alleles were derived from the *p1-wwB54* maize line which  
270 has a deleted *p1* gene and intact *p2* gene. The *p2* gene transcript was not detected in the pericarp  
271 tissue of *p1-wwB54* (Figure 7, lane 3), confirming previous results that *p2* is normally not  
272 expressed in kernel pericarp (Zhang, P. *et al.* 2000). However, *p2* transcripts were seen in all six  
273 inversion cases (Figure 7, lanes 4 – 9). To confirm the origin of these transcripts, the RT-PCR  
274 product of one inversion was sequenced and found to have sequence polymorphisms matching  
275 the *p2* gene (Figure S2). These results show that, unlike the progenitor *p1-wwB54*, *p2* is  
276 expressed in the pericarp tissue of all six inversion alleles. This ectopic *p2* expression likely  
277 resulted from the proximity of the *p2* gene promoter within the inverted fragment to the *p1* 3'  
278 enhancer. In the progenitor *p1-wwB54*, the *p2* promoter region and *p1* 3' enhancer are separated  
279 by 83.3 kb, whereas in the inversion alleles, this distance was reduced to between 7.4 and 8.2 kb.  
280 These results demonstrate the unique ability of inversions to modify gene expression near  
281 inversion breakpoints by changing the distance from regulatory elements to their target genes.

282

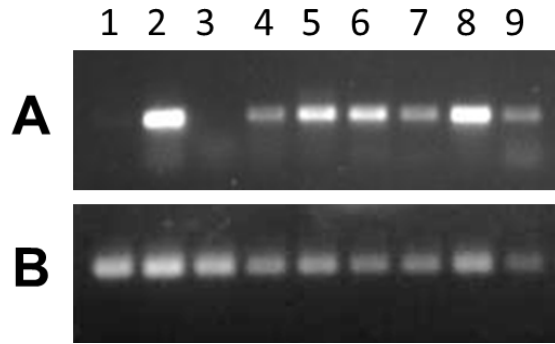

283

284 Figure 7: RT-PCR. Agarose gel images showing RT-PCR results using RNA extracted from pericarp  
285 tissue and reverse transcribed to cDNA. PCR with primers from A) *p2* exons 1 and 3, B) *Beta-tubulin* as  
286 an internal control. Lane 1, J (*p1-ww*) is negative control; Lane 2, *P1-rr4B2* is positive control for *p1*  
287 expression; Lane 3, *p1-wwB54* is the progenitor and lacks *p2* expression; Lane 4, 140; Lane 5, E1; Lane  
288 6, TZ3-4; Lane 7, SP1-18; Lane 8, S25; and Lane 9, TZ2-7. All six inversion alleles are positive for *p2*  
289 expression.

290

## 291 Discussion

### 292 *Mechanisms of inversions*

293 A variety of molecular mechanisms are known to induce inversions. The double-strand break  
294 (DSB) mechanism involves breakage and then repair by Non-Homologous End Joining (NHEJ)  
295 (Moore and Haber 1996). If two double-strand breaks occur on the same chromosome, re-  
296 ligation of the DNA molecule via NHEJ can form inversions (Hefferin and Tomkinson 2005),  
297 deletions, or inversions flanked by inverted duplications, if the DSBs are staggered cuts (Ranz *et al.*  
298 *al.* 2007). Additionally, inversions can result from ectopic recombination (Non-Allelic  
299 Homologous Recombination, NAHR) between dispersed repeated sequences including  
300 transposons (Delprat *et al.* 2009), retrotransposons (Kupiec and Petes 1988), interspersed repeat  
301 sequences (Montgomery *et al.* 1991), or interspersed duplications (Cáceres *et al.* 2007). For  
302 example, NAHR between pairs of homologous TEs present in opposite orientations at different

303 positions on a chromosome can lead to inversions of the DNA segment between the two TEs  
304 (Delprat *et al.*, 2009). Recently, CRISPR has also been used to induce inversions in mammals  
305 (Guo *et al.* 2015) and maize (Schwartz *et al.* 2020).

306

307 Here we show that DNA transposons, in addition to serving as passive substrates for ectopic  
308 recombination, also directly induce inversions via Alternative Transposition reactions. Our  
309 results are consistent with a model of RET-induced inversion, in which the ends of two nearby  
310 DNA transposons are involved in a single transposition reaction. In this model, two TE copies  
311 present in direct orientation will have their adjacent termini in a reversed orientation (i.e., the 5'  
312 end of one TE faces 3' end of a second TE). Recognition of the terminal sequences of the two  
313 TEs by the transposase will lead to an RET event in which the TE termini facing each other  
314 attempt to transpose to a genomic target site. Because each TE remains linked to the donor  
315 sequences by one un-transposed end, RET results in inversion of a flanking segment, and loss of  
316 the fragment originally between the two TEs (Figure 2). Specifically, the DNA segment from  
317 one TE end to the new insertion site is inverted. The resulting inversion has TEs present at each  
318 breakpoint; one within the inversion and another just outside the second endpoint (Figure 6D).  
319 The TE insertion is accompanied by a Target Site Duplications (TSD) flanking the TE termini at  
320 the inversion breakpoints. As in standard transposition, the TSD is a result of the staggered cut  
321 made by transposase followed by gap-filling and DNA ligation (Lazarow *et al.*, 2013).

322

323 There are several important differences between inversions resulting from ectopic recombination  
324 (NAHR) between two inversely oriented TEs and those caused by RET. First, inversions formed  
325 by NAHR will not have a newly generated TSD; instead, the TSDs flanking the internal TE



326 termini will also be inverted, resulting in TEs with (usually) non-identical TSDs. Second,  
327 NAHR between two inversely oriented TEs can only flip the intervening segment; whereas, RET  
328 can induce inversions of varying lengths on either side of each TE. Third, RET will only operate  
329 on Class II TEs that transpose via “cut-and-paste” mechanism, and will not occur with Class I  
330 elements that utilize a retro-transposition mechanism. Fourth, RET requires the expression of a  
331 DNA transposase and transposition-competent TE termini in appropriate orientation; whereas,  
332 NAHR proceeds via the action of host recombination machinery on substrate sequences of  
333 sufficient homology and orientation.

334

335 The maize *Ac/Ds* system is not the only known system that can cause inversions and other  
336 rearrangements. Like *Ac/Ds* elements in maize, the *P-elements* in *Drosophila* are also known to  
337 cause inversions and other chromosomal rearrangements through Alternative Transpositions  
338 (Gray *et al.* 1996; Tanaka *et al.* 1997). Other examples of such rearrangements via non-standard  
339 transposition include *impala* elements in the fungus *Fusarium* (Hua-Van *et al.* 2002) and  
340 *Sleeping Beauty* transposons in transgenes of mice (Geurts *et al.* 2006).

341

342 In addition to RET, the *Ac/Ds* elements can also undergo Sister Chromatid Transposition (SCT)  
343 (Zhang, J. and Peterson 2005; Zhang *et al.* 2013). While RET targets TEs on the same  
344 chromosome, SCT involves TEs on sister chromatids. After DNA replication, a pair of *Ac* 5' and  
345 3' termini in direct orientation can move to an un-replicated region where they can undergo a  
346 second round of replication. This results in inverted duplications and Composite Insertions  
347 (Wang *et al.* 2020). Both SCT and RET can lead to major rearrangements in the genome.  
348 Transposition in the *Ac/Ds* system is non-random (Vollbrecht *et al.* 2010) as *Ac* transposes

349 preferentially into hypomethylated DNA (Kolkman *et al.* 2005) often associated with genic  
350 regions (Cowperthwaite *et al.* 2002). This insertion preference likely increases the potential  
351 genetic impact of *Ac/Ds*-induced Alternative Transposition events.

352

### 353 ***Frequency of Inversions and Other Rearrangements***

354 In a previous study, Yu *et al.* (2011) screened alleles with reverse-oriented *Ac/fAc* insertions in  
355 an active *p1* gene for RET-induced loss of function mutants. Out of 100 mutants obtained, 89  
356 were identified to have undergone major structural changes. Approximately half (47 out of 89)  
357 were inversions, and the rest were primarily deletions plus some other rearrangements. This  
358 result is consistent with the RET model which predicts that inversions and deletions are equally  
359 likely to occur, because the outcome is determined by which transposon end (*Ac* or *fAc*) is  
360 ligated to which side (*a* or *b*) of the transposition target site. Here, we screened ears from  
361 roughly 4000 plants of *p1-wwB54/p1-ww(J)* genotype for red kernels indicating putative  
362 rearrangements. About 400 unique red kernel events were found and propagated. The red  
363 pericarp phenotype was inherited in 97 cases; 83 of these were characterized as rearrangements  
364 due to RET. Among these 83, only 14% (12 out of 83) were inversions, 35% (29) were deletions,  
365 and 51% (42) were Composite Insertions. The markedly different proportion of inversions  
366 recovered here (14%) compared to Yu *et al.* 2011 (53%) is most likely due to the different  
367 screens used to detect RET events. The 2011 study began with a functional *p1* gene and selected  
368 for loss-of-function events, yielding mostly deletions and inversions; most Composite Insertions  
369 would not be detected because they leave the original donor locus intact (Zhang *et al.* 2014; Su *et*  
370 *al.* 2018, 2020). Whereas, this study began with a non-functional *p1* allele, and required gain-of-  
371 function (red pericarp sectors). This selection favored recovery of *p2*-expressing alleles caused

372 by inversions and Composite Insertions near *p2* (Su *et al.*, 2020). Indeed, all six of the cases  
373 described here have inversion breakpoints within 3.5 kb upstream of the *p2* gene. This brings the  
374 *p2* promoter to within 10 kb of the *p1* pericarp enhancer (Sidorenko *et al.*, 2000), thus activating  
375 the *p2* gene in a tissue in which it is not normally expressed.

376

377 The six inversion cases described here have no other detectable rearrangements. However, we  
378 also obtained seven other cases of inversions which contain other more complicated structural  
379 rearrangements. These cases of complex inversions are currently being characterized and will be  
380 described elsewhere.

381

### 382 *Effects of Inversions on Fitness*

383 Inversions can have a variety of effects, such as causing position effect variegation of *white* gene  
384 in *Drosophila* (Muller 1930; Levis *et al.* 1985; Lerach *et al.* 2006; Bao *et al.* 2007), suppressing  
385 recombination (Jiang *et al.* 2007), and playing a vital role in the evolution of sex chromosomes  
386 (Wright *et al.* 2016). Inversions are also associated with local adaptation and reproductive  
387 isolation (Lowry and Willis 2010), as many closely related species are thought to have diverged  
388 via inversion polymorphisms (Oneal *et al.* 2014; Twyford and Friedman 2015). Inversion of  
389 boundary elements may also change higher-order organization in mammalian genomes, due to  
390 the directional nature of CTCF binding sites (Guo *et al.* 2015). By altering topologically  
391 associated domains (TAD) boundaries, inversions can cause misexpression and disease by  
392 changing the relative position of enhancers and their target promoters (Lupiáñez *et al.* 2015;  
393 Bompadre and Andrey 2019).

394

395 Some inversions can result in major adaptive advantages; for example, the paracentric inversion  
396 in *Arabidopsis thaliana* induced by *Vandal* transposon activity is strongly associated with  
397 fecundity under drought conditions (Fransz *et al.* 2016). Inversions can even affect the spread of  
398 disease: a chromosome 2La inversion in *Anopheles gambiae* is associated with susceptibility of  
399 the vector to malaria infection (Riehle *et al.* 2017). Inversions are also involved in local  
400 adaptation in teosinte populations (Pyhäjärvi *et al.* 2013). A large (13 Mb) inversion called  
401 *Inv4m* found in Mexican highland maize populations affects expression of a large number of  
402 genes regulating various developmental and physiological processes contributing to local  
403 adaptation to highland environments (Crow *et al.* 2020).

404

405 The phlobaphene pigments controlled by the maize *p1* gene are non-essential, and many modern  
406 corn varieties lack significant kernel pericarp color. However, a recent study reported that high  
407 phlobaphene levels were associated with increased kernel pericarp thickness and reduced  
408 mycotoxin contamination when compared to isogenic colorless pericarp lines lacking an active  
409 *p1* gene (Landoni *et al.* 2020). Because the *p1* and *p2*-encoded proteins are highly similar and  
410 regulate the same flavonoid biosynthetic pathway (Zhang P. *et al.* 2000), similar effects are  
411 likely induced by the expression of *p2* in the pericarp. Thus, the transposon-induced inversions  
412 identified here may provide an adaptive benefit. Small (< 1 Mb) inversions are difficult to detect  
413 by genetic and cytological methods, and so their frequency in plant populations is often  
414 unknown. Our results show that even small, cytologically undetectable inversions between  
415 linked genes may positively affect fitness. In summary, these findings suggest that Alternative  
416 Transposition events may play a critical role in altering gene expression and generating adaptive  
417 variation during genome evolution.

418

419 **Acknowledgments**

420 We thank Jeremy Schuster and Matthew Johnston for field assistance, and Terry Olson for  
421 technical assistance. This research is supported by the USDA National Institute of Food and  
422 Agriculture Hatch project number IOW05282, and by State of Iowa funds.

423

424 **Literature Cited**

425 Athma, P., E. Grotewold, and T. Peterson, 1992 Insertional mutagenesis of the maize P gene by  
426 intragenic transposition of Ac. *Genetics*, 131(1), pp. 199-209.

427

428 Bao, X., H. Deng, J. Johansen, J. Girton, K. M. Johansen, 2007 Loss-of-Function Alleles of the  
429 JIL-1 Histone H3S10 Kinase Enhance Position-Effect Variegation at Pericentric Sites in  
430 *Drosophila* Heterochromatin. *Genetics*, 176(2), pp. 1355-1358. doi:  
431 10.1534/genetics.107.073676.

432

433 Becker, H. A. and R. Kunze, 1997 Maize Activator transposase has a bipartite DNA binding  
434 domain that recognizes subterminal sequences and the terminal inverted repeats. *Molecular*  
435 *Genetics and Genomics*, 254(3), pp. 219-230. doi: 10.1007/s004380050410.

436

437 Bompadre, O. and G. Andrey, 2019 Chromatin topology in development and disease. *Current*  
438 *Opinion in Genetics & Development*, Volume 55, pp. 32-38. doi: 10.1016/j.gde.2019.04.007.

439

440 Cáceres, M., R. T. Sullivan, and J. W. Thomas, 2007 A recurrent inversion on the eutherian X  
441 chromosome. *Proceedings of the National Academy of Sciences of the United States of America*,  
442 104(47), pp. 18571-18576. doi: 10.1073/pnas.0706604104.  
443  
444 Cowperthwaite, M., W. Park, Z. Xu, X. Yan, S. C. Maurais *et al.*, 2002 Use of the transposon Ac  
445 as a gene-searching engine in the maize genome. *Plant Cell*, 14(3): 713-26. doi:  
446 10.1105/tpc.010468.  
447  
448 Crow, T., J. Ta, S. Nojoomi, M. R. Aguilar-Rangel, J. V. T. Rodríguez *et al.*, 2020 Gene  
449 regulatory effects of a large chromosomal inversion in highland maize. *PLOS Genetics*, 16(12):  
450 e1009213. <https://doi.org/10.1371/journal.pgen.1009213>  
451  
452 Delprat, A., B. Negre, M. Puig, and A. Ruiz, 2009 The transposon Galileo generates natural  
453 chromosomal inversions in *Drosophila* by ectopic recombination. *PLOS ONE*, 4(11).  
454 <https://doi.org/10.1371/journal.pone.0007883>.  
455  
456 Dooner, H. K., T. P. Robbins, and R. A. Jorgensen, 1991 Genetic and developmental control of  
457 anthocyanin biosynthesis. *Annual Review of Genetics*, 25(1), pp. 173-199.  
458 <https://doi.org/10.1146/annurev.ge.25.120191.001133>.  
459  
460 Emerson, R. A., 1917 Genetical studies of variegated pericarp in maize. *Genetics* 2: 1–35  
461

462 Frasz, P., G. Linc, C. R. Lee, S. A. Aflitos, J. R. Lasky *et al.*, 2016 Molecular, genetic and  
463 evolutionary analysis of a paracentric inversion in *Arabidopsis thaliana*. *Plant Journal*, 88(2), pp.  
464 159-178. doi: 10.1111/tpj.13262.

465  
466 Geurts, A. M., L. S. Collier, J. L. Geurts, L. L. Oseth, M. L. Bell *et al.*, 2005 Gene Mutations and  
467 Genomic Rearrangements in the Mouse as a Result of Transposon Mobilization from  
468 Chromosomal Concatemers. *PLOS Genetics*, 2(9), pp. 1413-1423. doi:  
469 10.1371/journal.pgen.0020156.

470  
471 Goettel, W. and J. Messing, 2009 Change of gene structure and function by non-homologous  
472 end-joining, homologous recombination, and transposition of DNA. *PLOS Genetics*, 5(6).  
473 <https://doi.org/10.1371/journal.pgen.1000516>.

474  
475 Gray, Y. H. M., M. M. Tanaka, and J. A. Sved, 1996 P-Element-Induced Recombination in  
476 *Drosophila melanogaster*: Hybrid Element Insertion. *Genetics*, 144(4), pp. 1601-1610.

477  
478 Grotewold, E., P. Athma, and T. Peterson, 1991 Alternatively spliced products of the maize P  
479 gene encode proteins with homology to the DNA binding domain of Myb-like transcription  
480 factors. *Proc. Natl. Acad. Sci.* 88: 4587-4591. <https://doi.org/10.1073/pnas.88.11.4587>.

481  
482 Grotewold, E., B. J. Drummond, B. Bowen, and T. Peterson, 1994 The myb-homologous P gene  
483 controls phlobaphene pigmentation in maize floral organs by directly activating a flavonoid  
484 biosynthetic gene subset. *Cell*, 76(3), pp. 543-553. doi: 10.1016/0092-8674(94)90117-1.

485

486 Guo, Y., Q. Xu, D. Canzio, J. Shou, J. Li *et al.*, 2015 CRISPR Inversion of CTCF Sites Alters  
487 Genome Topology and Enhancer/Promoter Function. *Cell*, 162(4), pp. 900-910. doi:  
488 10.1016/j.cell.2015.07.038.

489

490 Hefferin, M. L. and A. E. Tomkinson, 2005 Mechanism of DNA double-strand break repair by  
491 non-homologous end joining. *DNA Repair*, 4(6), pp. 639-648. doi:  
492 10.1016/j.dnarep.2004.12.005.

493

494 Huang, J. T. and H. K. Dooner, 2008 Macrotransposition and Other Complex Chromosomal  
495 Restructuring in Maize by Closely Linked Transposons in Direct Orientation. *The Plant Cell*,  
496 20(8), pp. 2019-2032. doi: <https://doi.org/10.1105/tpc.108.060582>

497

498 Hua-Van, A., T. Langin, and M. J. Daboussi, 2002 Aberrant transposition of a Tc1-mariner  
499 element, impala, in the fungus *Fusarium oxysporum*. *Molecular Genetics and Genomics*, 267(1),  
500 pp. 79-87. doi: 10.1007/s00438-002-0638-9.

501

502 Jiang, L., W. Zhang, Z. Xia, G. Jiang, Q. Qian *et al.*, 2007 A paracentric inversion suppresses  
503 genetic recombination at the FON3 locus with breakpoints corresponding to sequence gaps on  
504 rice chromosome 11L. *Molecular Genetics and Genomics*, 277(3), pp. 263-272.

505 doi:10.1007/s00438-006-0196-7.

506



507 Kolkman, J. M., L. J. Conrad, P. R. Farmer, K. Hardeman, K. R. Ahern *et al.*, 2005 Distribution  
508 of Activator (Ac) Throughout the Maize Genome for Use in Regional Mutagenesis. *Genetics*,  
509 169(2), pp. 981-995. doi: 10.1534/genetics.104.033738.

510

511 Kupiec, M. and T. D. Petes, 1988 Allelic and ectopic recombination between Ty elements in  
512 yeast. *Genetics*, 119(3), pp. 549-559.

513

514 Landoni, M., D. Puglisi, E. Cassani, G. Borlini, G. Brunoldi *et al.*, 2020 Phlobaphenes modify  
515 pericarp thickness in maize and accumulation of the fumonisin mycotoxins. *Scientific Reports*,  
516 10(1), p. 1417. <https://doi.org/10.1038/s41598-020-58341-8>.

517

518 Lazarow, K., M. L. Doll, and R. Kunze, 2013 Molecular biology of maize Ac/Ds elements: an  
519 overview. *Methods of Molecular Biology*, Volume 1057, pp. 59-82. doi: 10.1007/978-1-62703-  
520 568-2\_5.

521

522 Lerach, S., W. Zhang, X. Bao, H. Deng, J. Girton *et al.*, 2006 Loss-of-function alleles of the JIL-  
523 1 kinase are strong suppressors of position effect variegation of the wm4 allele in *Drosophila*.  
524 *Genetics*, 173(4), pp. 2403-2406. doi: 10.1534/genetics.106.059253

525

526 Levis, R., T. Hazelrigg, and G. Rubin, 1985 Effects of genomic position on the expression of  
527 transduced copies of the white gene of *Drosophila*. *Science*, 229(4713), pp. 558-561. doi:  
528 10.1126/science.2992080.

529

530 Lowry, D. B. and J. H. Willis, 2010 A widespread chromosomal inversion polymorphism  
531 contributes to a major life-history transition, local adaptation, and reproductive isolation. *PLOS*  
532 *Biology*, 8(9), pp. 848-855. <https://doi.org/10.1371/journal.pbio.1000500>.

533

534 Lupiáñez, D. G., K. Kraft, V. Heinrich, P. Krawitz, F. Brancati *et al.*, 2015 Disruptions of  
535 Topological Chromatin Domains Cause Pathogenic Rewiring of Gene-Enhancer Interactions.  
536 *Cell*, 161(5), pp. 1012-1025. doi: 10.1016/j.cell.2015.04.004.

537

538 McClintock, B., 1950 The origin and behavior of mutable loci in maize. *Proceedings of the*  
539 *National Academy of Sciences of the United States of America*, 36(6), pp. 344-355.  
540 <https://doi.org/10.1073/pnas.36.6.344>.

541

542 McClintock, B., 1951 Mutable Loci in Maize. *Carnegie Inst. Wash. YearBook* 49:157-167.

543

544 Meyer, J. D. F., M. E. Snook, K. E. Houchins, B. G. Rector, N. W. Widstrom *et al.*, 2007  
545 Quantitative trait loci for maysin synthesis in maize (*Zea mays* L.) lines selected for high silk  
546 maysin content. *Theor Appl Genet* 115, 119–128. <https://doi.org/10.1007/s00122-007-0548-7>.

547

548 Montgomery, E. A., S. M. Huang, C. H. Langley, and B. H. Judd, 1991 Chromosome  
549 rearrangement by ectopic recombination in *Drosophila melanogaster*: genome structure and  
550 evolution. *Genetics*, 129(4), pp. 1085-1098.

551

552 Moore, J. K. and J. E. Haber, 1996 Cell cycle and genetic requirements of two pathways of  
553 nonhomologous end-joining repair of double-strand breaks in *Saccharomyces cerevisiae*.  
554 *Molecular and Cellular Biology*, 16(5), pp. 2164-2173. doi: 10.1128/mcb.16.5.2164.  
555

556 Moreno, M. A., J. Chen, I. Greenblatt, and S. L. Dellaporta, 1992 Reconstititional mutagenesis  
557 of the maize P gene by short-range Ac transpositions. *Genetics*, 131(4), pp. 939-956.  
558

559 Muller, H. J., 1930 Types of visible variations induced by X-rays in *Drosophila*. *Journal of*  
560 *Genetics*, 22, pp. 299-334. <https://doi.org/10.1007/BF02984195>.  
561

562 Ochman, H., A. S. Gerber, and D. L. Hartl, 1988 Genetic applications of an inverse polymerase  
563 chain reaction. *Genetics*, vol. 120 no. 3 621-623.  
564

565 Oneal, E., D. B. Lowry, K. M. Wright, Z. Zhu, and J. H. Willis, 2014 Divergent population  
566 structure and climate associations of a chromosomal inversion polymorphism across the  
567 *Mimulus guttatus* species complex. *Molecular Ecology*, 23(11), pp. 2844-2860. doi:  
568 10.1111/mec.12778.  
569

570 Pulletikurti, V., C. Yu, J. Zhang, T. Peterson, and D. F. Weber, 2009 Cytological Evidence that  
571 Alternative Transposition by Ac Elements Causes Reciprocal Translocations and Inversions in  
572 *Zea mays* L. *Maydica*, 54(4), pp. 457-462.  
573

574 Pyhäjärvi, T., M. B. Hufford, S. Mezouk, and J. Ross-Ibarra, 2013 Complex Patterns of Local  
575 Adaptation in Teosinte. *Genome Biol Evol.*; 5(9): 1594–1609. doi: 10.1093/gbe/evt109  
576  
577 Ranz, J. M., D. Maurin, Y. S. Chan, M. v. Grotthuss, L. W. Hillier *et al.*, 2007 Principles of  
578 Genome Evolution in the *Drosophila melanogaster* Species Group. *PLOS Biology*, 5(6).  
579 <https://doi.org/10.1371/journal.pbio.0050152>.  
580  
581 Riehle, M. M., T. Bukhari, A. Gneme, W. M. Guelbeogo, B. Coulibaly *et al.*, 2017 The  
582 *Anopheles gambiae* 2La chromosome inversion is associated with susceptibility to *Plasmodium*  
583 *falciparum* in Africa. *eLife*, Volume 6. doi: 10.7554/eLife.25813.  
584  
585 Rubin, E., G. Lithwick, and A. A. Levy, 2001 Structure and Evolution of the hAT Transposon  
586 Superfamily. *Genetics*, Volume 158, Issue 3, Pages 949–957.  
587  
588 Saghai-Marroof, M. A., K. M. Soliman, R. A. Jorgensen, and R. W. Allard, 1984 Ribosomal  
589 DNA spacer-length polymorphisms in barley: mendelian inheritance, chromosomal location, and  
590 population dynamics. *Proceedings of the National Academy of Sciences of the United States of*  
591 *America*, 81(24), pp. 8014-8018. doi: 10.1073/pnas.81.24.8014.  
592  
593 Schwartz, C., B. Lenderts, L. Feigenbutz, P. Barone, V. Llaca *et al.* 2020 CRISPR–Cas9-  
594 mediated 75.5-Mb inversion in maize. *Nat. Plants* **6**, 1427–1431. doi:  
595 <https://doi.org/10.1038/s41477-020-00817-6>.  
596

597 Sharma, S. P. and T. Peterson, 2020 Rapid Detection of Transposon-Induced Genome  
598 Rearrangements. *In press*  
599

600 Sidorenko, L. V., Li, X., Cocciolone, S. M., Tagliani, L., Chopra, S., Bowen, B., Daniels, M.,  
601 and Peterson, T. 2000. Complex structure of a maize *Myb* gene promoter: functional analysis in  
602 transgenic plants. *The Plant Journal* 22: 471-482.  
603

604 Singh, M., P. E. Lewis, K. Hardeman, L. Bai, J. K. C. Rose *et al.*, 2003 Activator Mutagenesis of  
605 the Pink scutellum1/viviparous7 Locus of Maize. *The Plant Cell*, 15(4), pp. 874-884. doi:  
606 10.1105/tpc.010249.  
607

608 Su, W., S. P. Sharma, and T. Peterson, 2018 Evolutionary Impacts of Alternative Transposition.  
609 In: Pontarotti P. (eds) *Origin and Evolution of Biodiversity*. Springer, Cham.  
610 [https://doi.org/10.1007/978-3-319-95954-2\\_7](https://doi.org/10.1007/978-3-319-95954-2_7).  
611

612 Su, W., T. Zuo, and T. Peterson, 2020 Ectopic Expression of a Maize Gene Is Induced by  
613 Composite Insertions Generated Through Alternative Transposition. *Genetics*, 216(4), pp. 1039-  
614 1049. <https://doi.org/10.1534/genetics.120.303592>.  
615

616 Tanaka, M. M., X. M. Liang, Y. H. M. Gray, and J. A. Sved, 1997 The accumulation of P-  
617 element-induced recombinants in the germline of male *Drosophila melanogaster*. *Genetics*,  
618 147(4), pp. 1769-1782.  
619

620 Twyford, A. D. and J. Friedman, 2015 Adaptive divergence in the monkey flower *Mimulus*  
621 *guttatus* is maintained by a chromosomal inversion. *Evolution*, 69(6), pp. 1476-1486. doi:  
622 10.1111/evo.12663.

623

624 Vollbrecht, E., J. Duvick, J. P. Schares, K. R. Ahern, P. Deewatthanawong *et al.*, 2010 Genome-  
625 Wide Distribution of Transposed Dissociation Elements in Maize. *The Plant Cell*, 22(6), pp.  
626 1667-1685. doi: <https://doi.org/10.1105/tpc.109.073452>.

627

628 Wang, D. and T. Peterson, 2013 Isolation of sequences flanking Ac insertion sites by Ac casting.  
629 *Methods of Molecular Biology*, Volume 1057, pp. 117-122. doi: 10.1007/978-1-62703-568-2\_8.

630

631 Wang, D., J. Zhang, T. Zuo, M. Zhao, D. Lisch and T. Peterson, 2020 Small RNA-Mediated De  
632 Novo Silencing of Ac/Ds Transposons Is Initiated by Alternative Transposition in Maize  
633 *Genetics*, 215 (2), pp. 393–406. doi: <https://doi.org/10.1534/genetics.120.303264>

634

635 Wright, A. E., R. Dean, F. Zimmer, and J. E. Mank, 2016 How to make a sex chromosome.  
636 *Nature Communications*, 7, pp. 12087. <https://doi.org/10.1038/ncomms12087>.

637

638 Yu, C., J. Zhang, and T. Peterson, 2011 Genome Rearrangements in Maize Induced by  
639 Alternative Transposition of Reversed Ac/Ds Termini. *Genetics*, 188(1), pp. 59-67. doi:  
640 10.1534/genetics.111.126847.

641

- 642 Zhang, F. and T. Peterson, 2005 Comparisons of Maize pericarp color1 Alleles Reveal  
643 Paralogous Gene Recombination and an Organ-Specific Enhancer Region. *The Plant Cell*, 17 (3)  
644 903-914; doi: 10.1105/tpc.104.029660.
- 645
- 646 Zhang, J. and T. Peterson, 2004 Transposition of reversed Ac element ends generates  
647 chromosome rearrangements in maize. *Genetics*, 167(4), pp. 1929-1937. doi:  
648 10.1534/genetics.103.026229.
- 649
- 650 Zhang, J. and T. Peterson, 2005 A Segmental Deletion Series Generated by Sister-Chromatid  
651 Transposition of Ac Transposable Elements in Maize. *Genetics*, 171(1), pp. 333-344.  
652 <https://doi.org/10.1534/genetics.104.035576>.
- 653
- 654 Zhang, J., F. Zhang, and T. Peterson, 2006 Transposition of Reversed Ac Element Ends  
655 Generates Novel Chimeric Genes in Maize. *PLOS Genetics*, 2(10), pp. 1535-1540.  
656 <https://doi.org/10.1371/journal.pgen.0020164>.
- 657
- 658 Zhang, J., C. Yu, V. Pulletikurti, J. Lamb, T. Danilova *et al.*, 2009 Alternative Ac/Ds  
659 transposition induces major chromosomal rearrangements in maize. *Genes & Development*,  
660 23(6), pp. 755-765. doi: 10.1101/gad.1776909
- 661
- 662 Zhang, J., T. Zuo, and T. Peterson, 2013 Generation of tandem direct duplications by reversed-  
663 ends transposition of maize ac elements. *PLOS Genetics*, 9(8).  
664 <https://doi.org/10.1371/journal.pgen.1003691>.

665

666 Zhang, J., T. Zuo, D. Wang, and T. Peterson, 2014 Transposition-mediated DNA re-replication  
667 in maize. *eLife*, Volume 3. <https://doi.org/10.7554/eLife.03724.001>.

668

669 Zhang, P., S. Chopra, and T. Peterson, 2000 A Segmental Gene Duplication Generated  
670 Differentially Expressed myb-Homologous Genes in Maize. *The Plant Cell*, 12(12), pp. 2311-  
671 2322. <https://doi.org/10.1105/tpc.12.12.2311>.

672

673 Zhang, P., Y. Wang, J. Zhang, S. Maddock, M. Snook *et al.*, 2003 A maize QTL for silk maysin  
674 levels contains duplicated Myb-homologous genes which jointly regulate flavone biosynthesis.  
675 *Plant Molecular Biology*, 52(1), pp. 1-15. doi: 10.1023/a:1023942819106.

676

677 Zhang, Z., S. Schwartz, L. Wagner, and W. Miller, 2000 A greedy algorithm for aligning DNA  
678 sequences. *Journal of Computational Biology*, Volume 7, pp. 203-214. doi:  
679 10.1089/10665270050081478.



## Transposon-induced inversions activate gene expression in Maize pericarp

Sharu Paul Sharma\*, Tao Zuo\* and Thomas Peterson\*†

### Supplemental Information

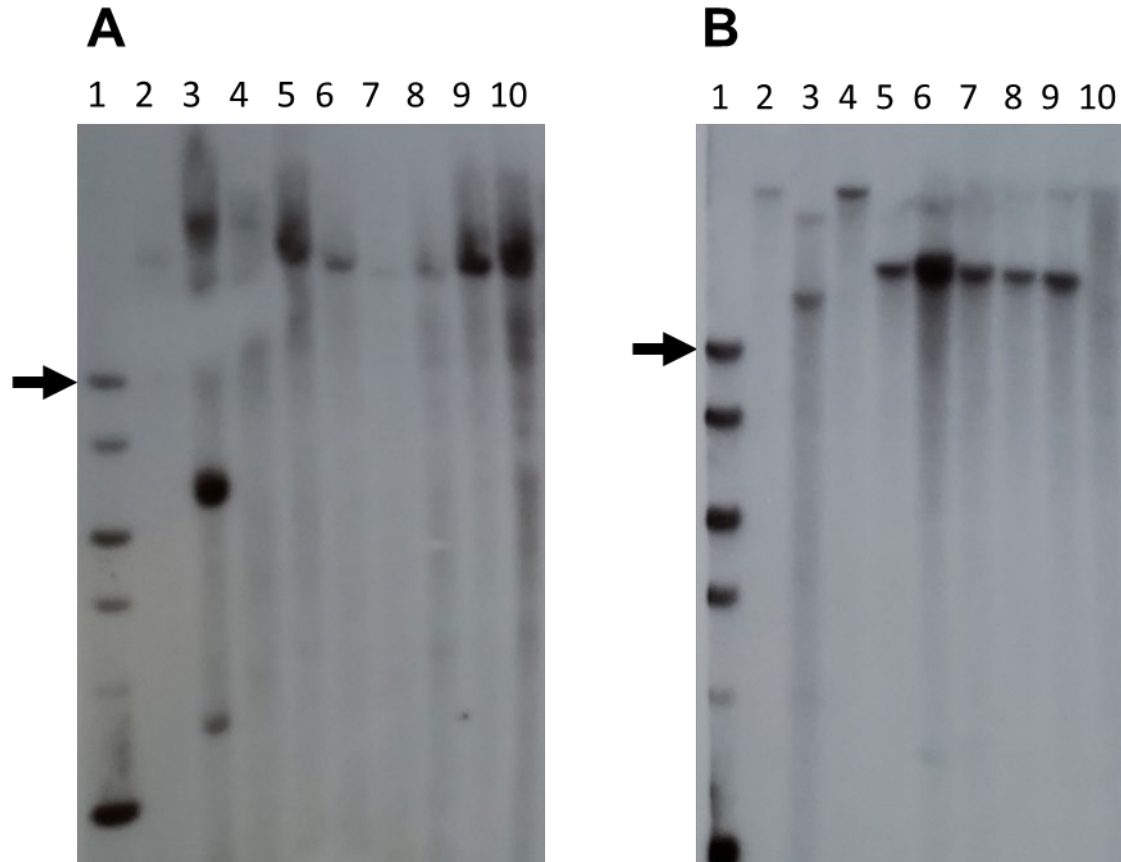

**Figure S1:** Southern Blot gel images using A) *HpaI* and B) *EcoRV* restriction enzymes with fragment-15 (within the *p1* enhancer) as a probe. Lane 1, DNA ladder, black arrow points to 10 kb fragment on each gel; Lane 2, J (*p1-ww*); Lane 3, *P1-rr4B2*; Lane 4, *p1-wwB54*; Lane 5, 140; Lane 6, E1; Lane 7, TZ3-4; Lane 8, SP1-18; Lane 9, S25; and Lane 10, TZ2-7.

**Figure S2: RT-PCR sequence aligned to *p1* and *p2* exons 1, 2 and 3. The middle sequence is RT-PCR product from E1 (one of the inversions), the upper sequence is from *p1* and the lower sequence is from *p2*. At three sites, SNPs in the RT-PCR product match *p2* (lower) but not *p1* (upper). Two additional SNPs in the RT-PCR product likely represent amplification or sequencing artefacts.**

### Exon 1

```
381   GCGGA-AGAGGACCAGTTACTTGCCAACTACATTGCGGAGCACGGCGAGGGGTCCTGGAG
      |||||  |||||||||||||||||||||||||||||||||||||||||||||||||||||||
3     GCGGATGAGGACCAGTTACTTGCCAACTACATTGCGGAGCACGGCGAGGGGTCCTGGAG
      |||||  | |||||||||||||||||||||||||||||||||||||||||||||||||||||
279   GCGGA-GGAGGACCAGTTACTTGCCAACTACATTGCGGAGCACGGCGAGGGGTCCTGGAG

GTCGCTGCCCAAGAATGCAG   459
|||
GTCGCTGCCCAAGAATGCAG   82
|||
GTCGCTGCCCAAGAATGCAG   357
```

### Exon 2

```
580   GCCTGCTCCGGTGCGGCAAGAGCTGCCGGCTCCGGTGGATCAACTACCTTCGGG
      |||||  |||||||||||||||||||||||||||||||||||||||||||||||||||||
83    GCCTGCTCCGGTGCGGCAAGAGCTGCCGGCTCCGGTGGATCAACTACCTCCGGG
      |||||  |||||||||||||||||||||||||||||||||||||||||||||||||||||
475   GCCTGCTCCGGTGCGGCAAGAGCTGCCGGCTCCGGTGGATCAACTACCTCCGGG

CGGACGTCAAGAGGGGGAACATCTCCAAGGAGGAAGAAGACATCATCATCAAGCTCCACG
|||
CGGACGTCAAGAGGGGGAACATCTCCAAGGAGGAAGAAGACATCATCATCAAGCTCCACG
|||
CGGACGTCAAGAGGGGGAACATCTCCAAGGAGGAAGAAGACATCATCATCAAGCTCCACG

CCACCCTCGGCAACAG   709
|||
CCACCCTCGGGAACAG   212
|||
CCACCCTCGGGAACAG   610
```

### Exon 3

```
5309  GTGGTCCCTGATCGCCAGCCACCTCCCC-GGCCGAAC   5344
      |||||  |||||
213   GTGGTCCCTGATCGCCAGCCACCTCCCCCGGCCGAAC   249
      |||||  |||||
4425  GTGGTCCCTGATCGCCAGCCACCTCCCC-GGCCGAAC   4460
```

**Table S1: Primers used for screening for inversions**

|                        |                                |                            |
|------------------------|--------------------------------|----------------------------|
| Set 1                  | GAACAGTGATGGGAATGTTG           | CTGCTAGCTGCTAGCTGTTAGGCTC  |
| Set 2                  | GAGTCGCGAGCAGTGGAG             | CTGCTAGCTGCTAGCTGTTAGGCTC  |
| <i>fAc-pl</i> junction | GACCGTGACCTGTCCGCTC            | TGCCATCTTCCACTCCTCGGCTTTAG |
| Nested                 | GGCATAGTGAGACCCATTCCTC<br>CTTC | CCTCTCCATGAGCAATGTGTCTTAT  |

**Table S2: Primers for sequencing inversion endpoints**

Primers for *Ac* side

|                                                |                            |
|------------------------------------------------|----------------------------|
| <i>Ac</i> primer: GCTCTACCGTTTCCGTTTCCGTTTACCG |                            |
| 140, E1, TZ3-4, SP1-18                         | TTATACTTGCAGCGCTGTGG       |
| S25                                            | TCTTTTGGCCATACGTCTCC       |
| TZ2-7                                          | CTTGGAGGACGAGGGATGGCAATGGG |

Primers for *fAc* side

|                                              |                             |
|----------------------------------------------|-----------------------------|
| <i>fAc</i> primer: CTGCTAGCTGCTAGCTGTTAGGCTC |                             |
| 140, E1, TZ3-4, SP1-18                       | GCAGCCTTTTCTTGCAGTCA        |
| S25                                          | CCCTCGTCCTCCAAGATTCTCCCCCTG |
| TZ2-7                                        | GATTGGCTGAACCGTGACGT        |

**Table S3: Primers used for RT-PCR**

|              |                         |                        |
|--------------|-------------------------|------------------------|
| <i>p2</i>    | GCGGAGGAGGACCAGTTAC     | CTGAGGTGCGAGTTCAGTAG   |
| Beta-tubulin | CTACCTCACGGCATCTGCTATGT | GTCACACACACTCGACTTCACG |

**Table S4: Inversion alleles, Target Site Duplications, and relevant distances (in basepairs)**

| <b>Name</b> | <b>Target Site Duplication</b> | <b>Distance from TSS</b> | <b>E-P distance</b> | <b>Size of Inverted fragment</b> |
|-------------|--------------------------------|--------------------------|---------------------|----------------------------------|
| 140         | CCGGTGGC                       | 3505                     | 8235                | 81800                            |
| E1          | CAGCCAGG                       | 3387                     | 8117                | 81682                            |
| TZ3-4       | TGTGTAGT                       | 3376                     | 8106                | 81671                            |
| SP1-18      | GTCGGGGC                       | 3203                     | 7933                | 81498                            |
| S25         | CTCGTCGA                       | 3070                     | 7800                | 81365                            |
| TZ2-7       | ATCTCTTC                       | 2692                     | 7422                | 80987                            |
